# Supplementary material for: The Interplay between Incipient Species and Social Polymorphism in the Desert Ant Cataglyphis
Source: PubMed Central journal article supplement (PMC6603034; doi:10.1038/s41598-019-45950-1), 2019-07-01
Supplement: 41598_2019_45950_MOESM1_ESM.pdf [file 41598_2019_45950_MOESM1_ESM.pdf]

Supplementary information

**The Interplay between Incipient Species and Social Polymorphism**  
**in the Desert Ant *Cataglyphis***

Tali Reiner Brodetzki<sup>1</sup>, Shani Inbar<sup>2</sup>, Pnina Cohen<sup>2</sup>, Serge Aron<sup>3</sup>, Eyal Privman<sup>2</sup>, and Abraham Hefetz<sup>1</sup>

<sup>1</sup> School of Zoology, George S. Wise Faculty of Life Sciences, Tel Aviv University, Tel Aviv, 6997801, Israel.

<sup>2</sup> Institute of Evolution, Department of Evolutionary and Environmental Biology, University of Haifa, Israel.

<sup>3</sup> Evolutionary Biology and Ecology, Université Libre de Bruxelles, Université D'Europe

**Supplementary figures captions:**

Figure S1: Sampling map of sample location of ants for the ddRAD. Locations are colored according to their genetic cluster.

Figure S2: comparison of reads coverage of each ant at the stage of raw reads (red) and after the alignment-based filtering (blue). Notice that the initial coverage is based on averaging the number of reads over the known number of restriction sites, while the final coverage is based on actual mapping of the reads to the reference genome of *C. drusus* and is therefore more accurate.

Figure S3: A) Typical cuticular hydrocarbon profile of the *drusus* mitotype from Betzet. The chromatogram shows only the 60 identified compounds (numbered peaks), of which 35 hydrocarbons were used in the analysis (marked in bold). B) The cuticular hydrocarbon profile from the Tel Baruch population CHC's used for the analysis is marked in bold (44 out of 74 identified).

Figure S4: Bayesian inference tree CytB haplotypes of sperm content from *niger* queens. Bayesian probabilities/bootstrap values (from Ugene) are given to estimate branch support. The trees are rooted using the haplotype sequences from Eyer *et al.* (2017).

Figure S1

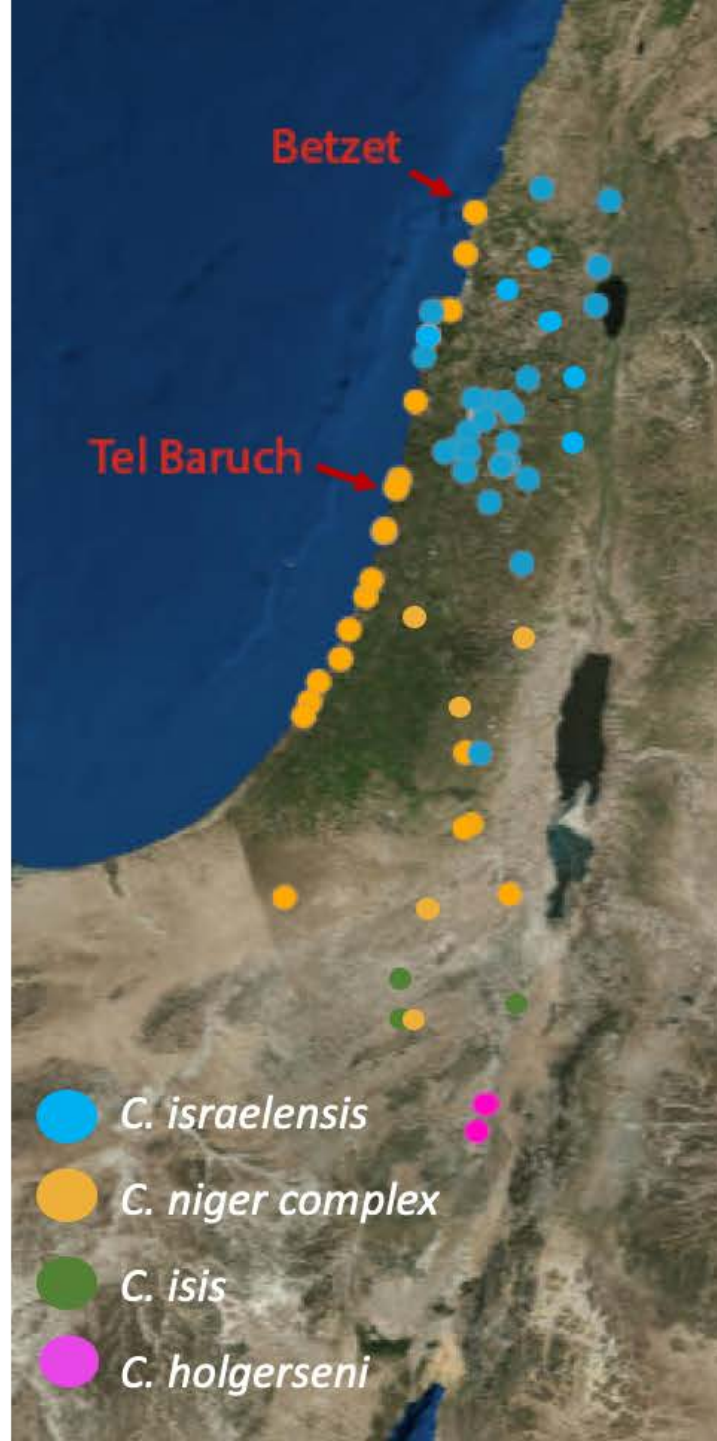

Map was created using ArcGIS® software by Esri. ArcGIS® and ArcMap™ are the intellectual property of Esri and are used herein under license. Copyright © Esri. All rights reserved. For more information about Esri® software, please visit [www.esri.com](http://www.esri.com)

Figure S2

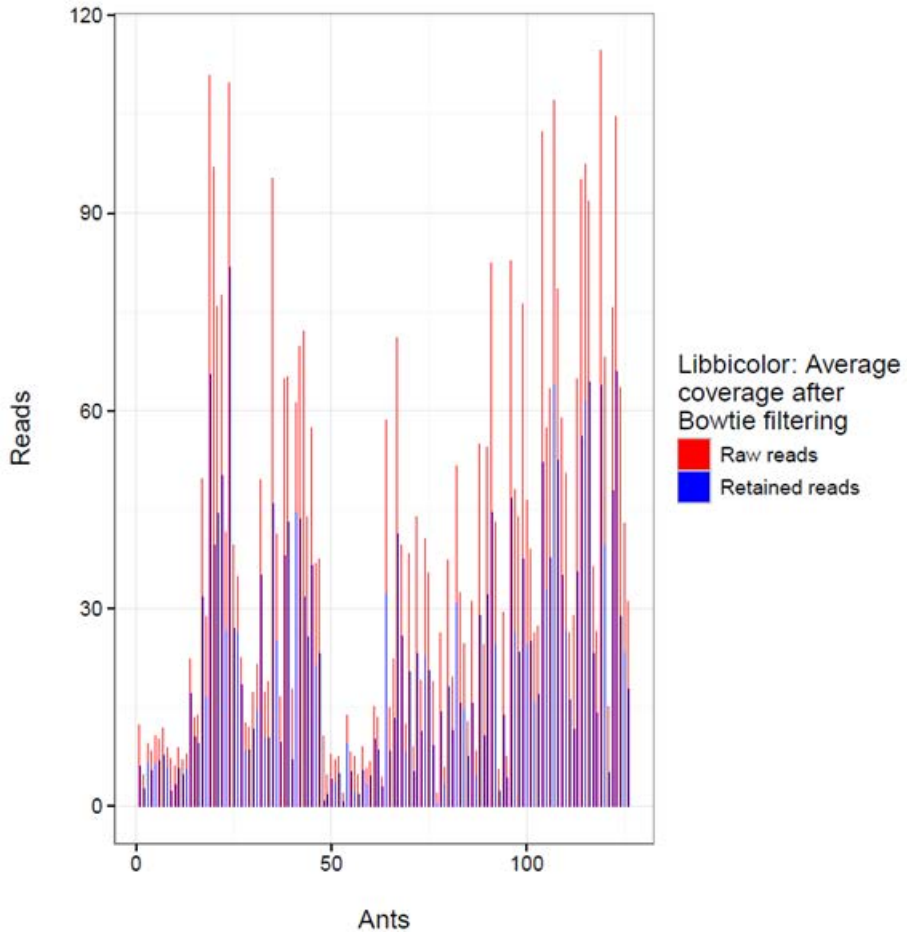

A

## Betzet

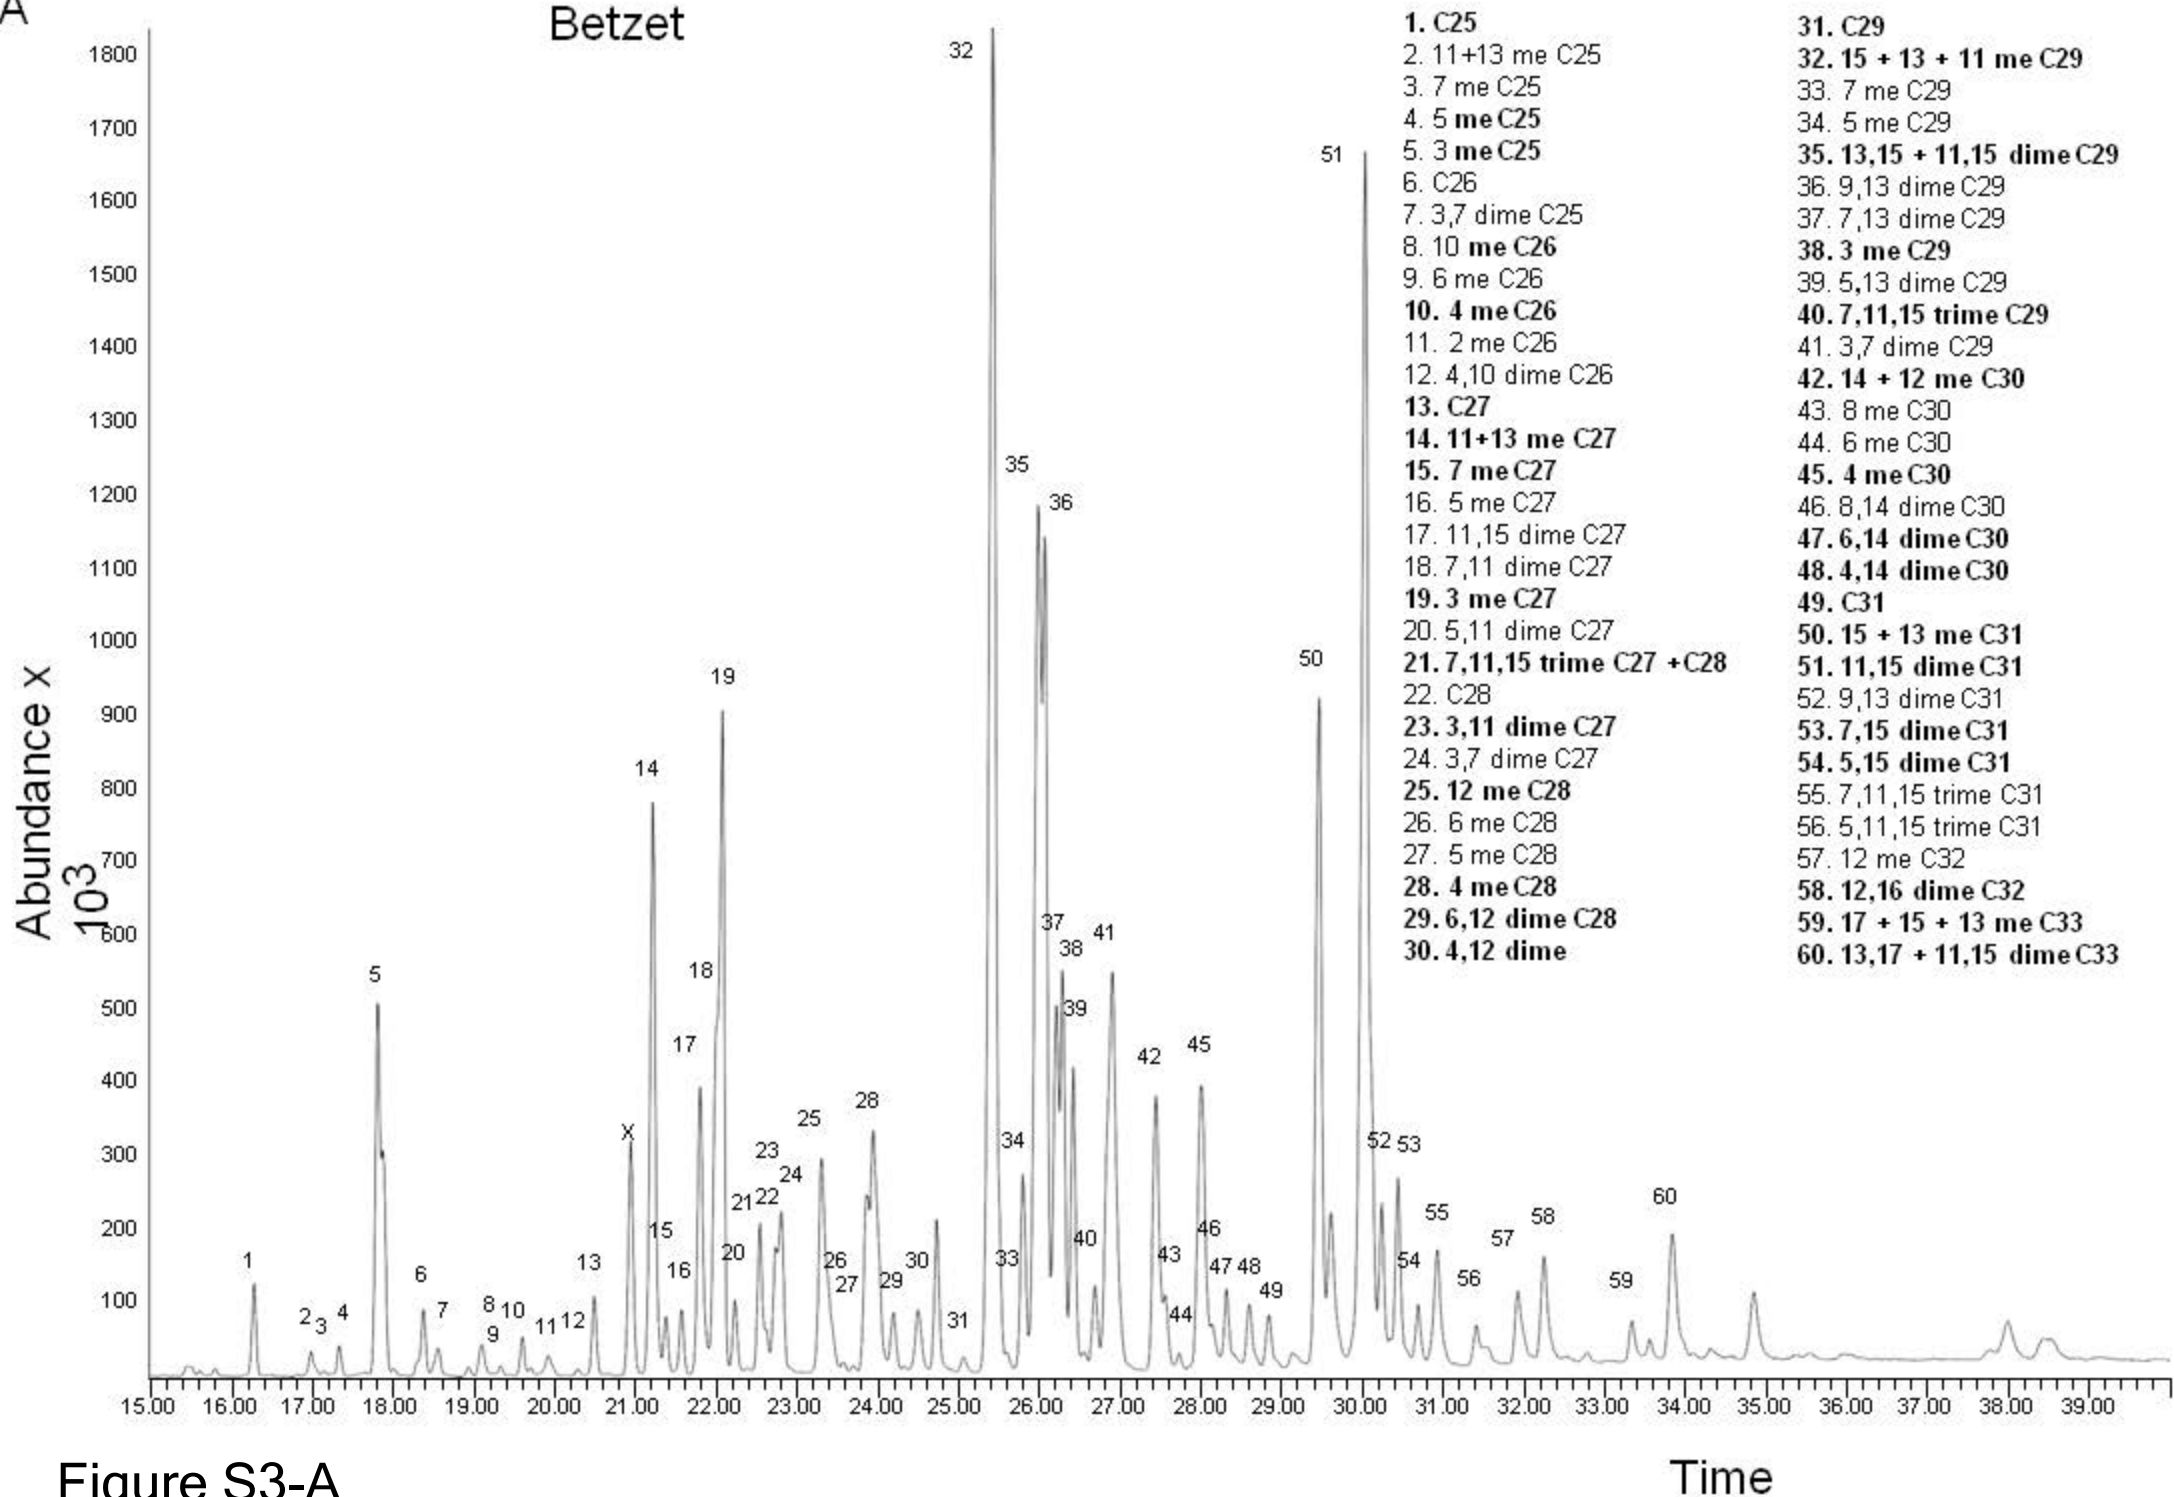

Figure S3-A

Time

B

## Tel Baruch

Abundance x10<sup>3</sup>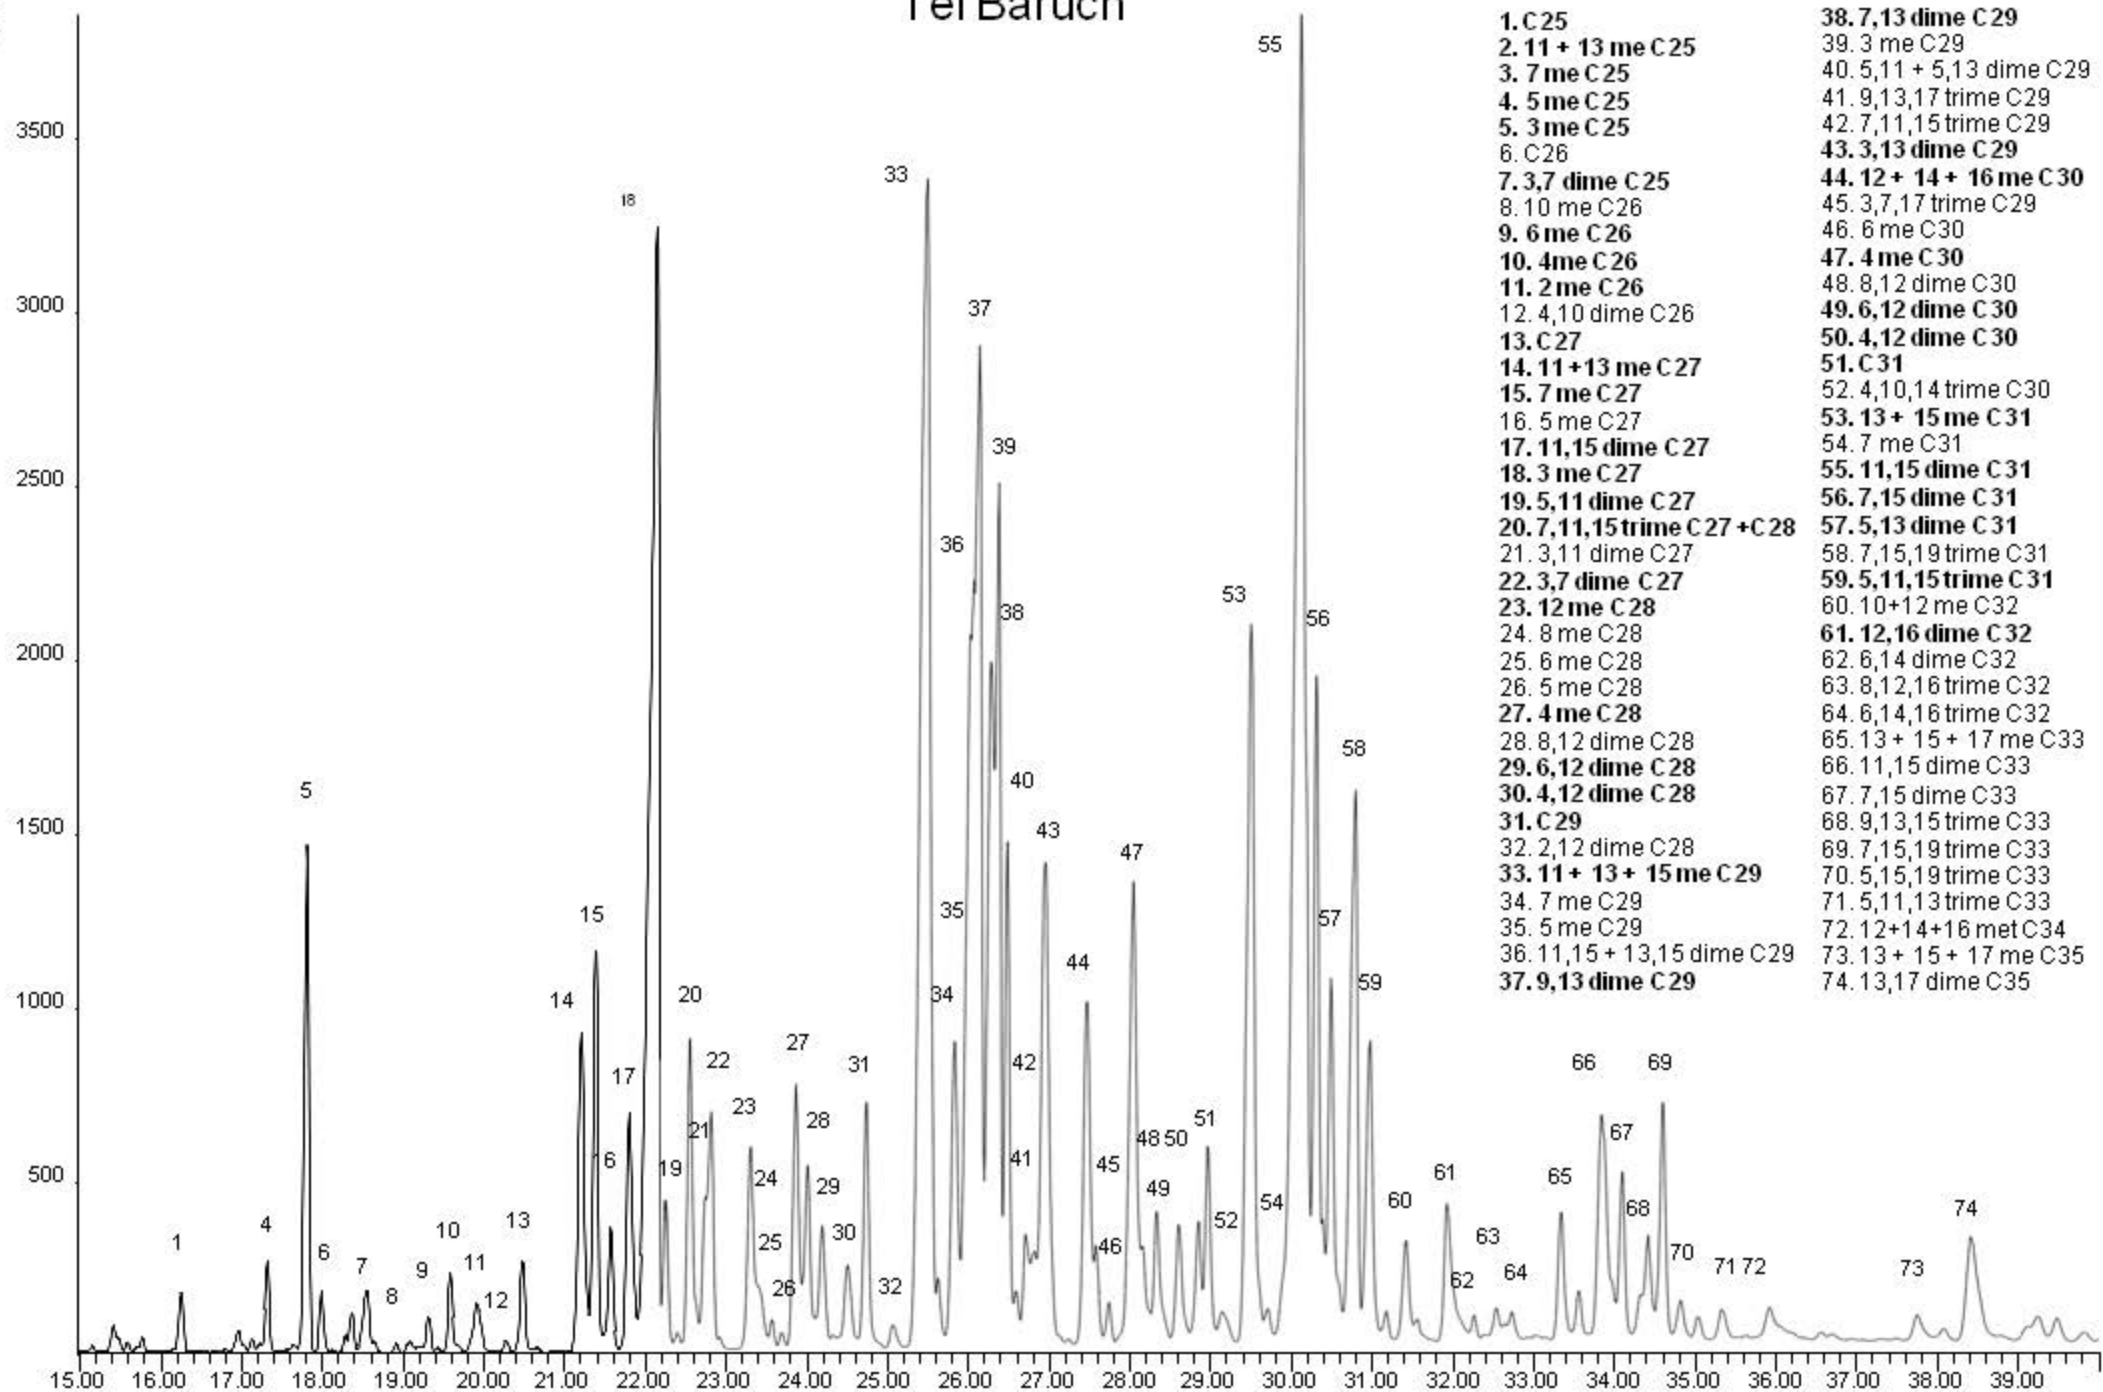

Figure S3-B

Time

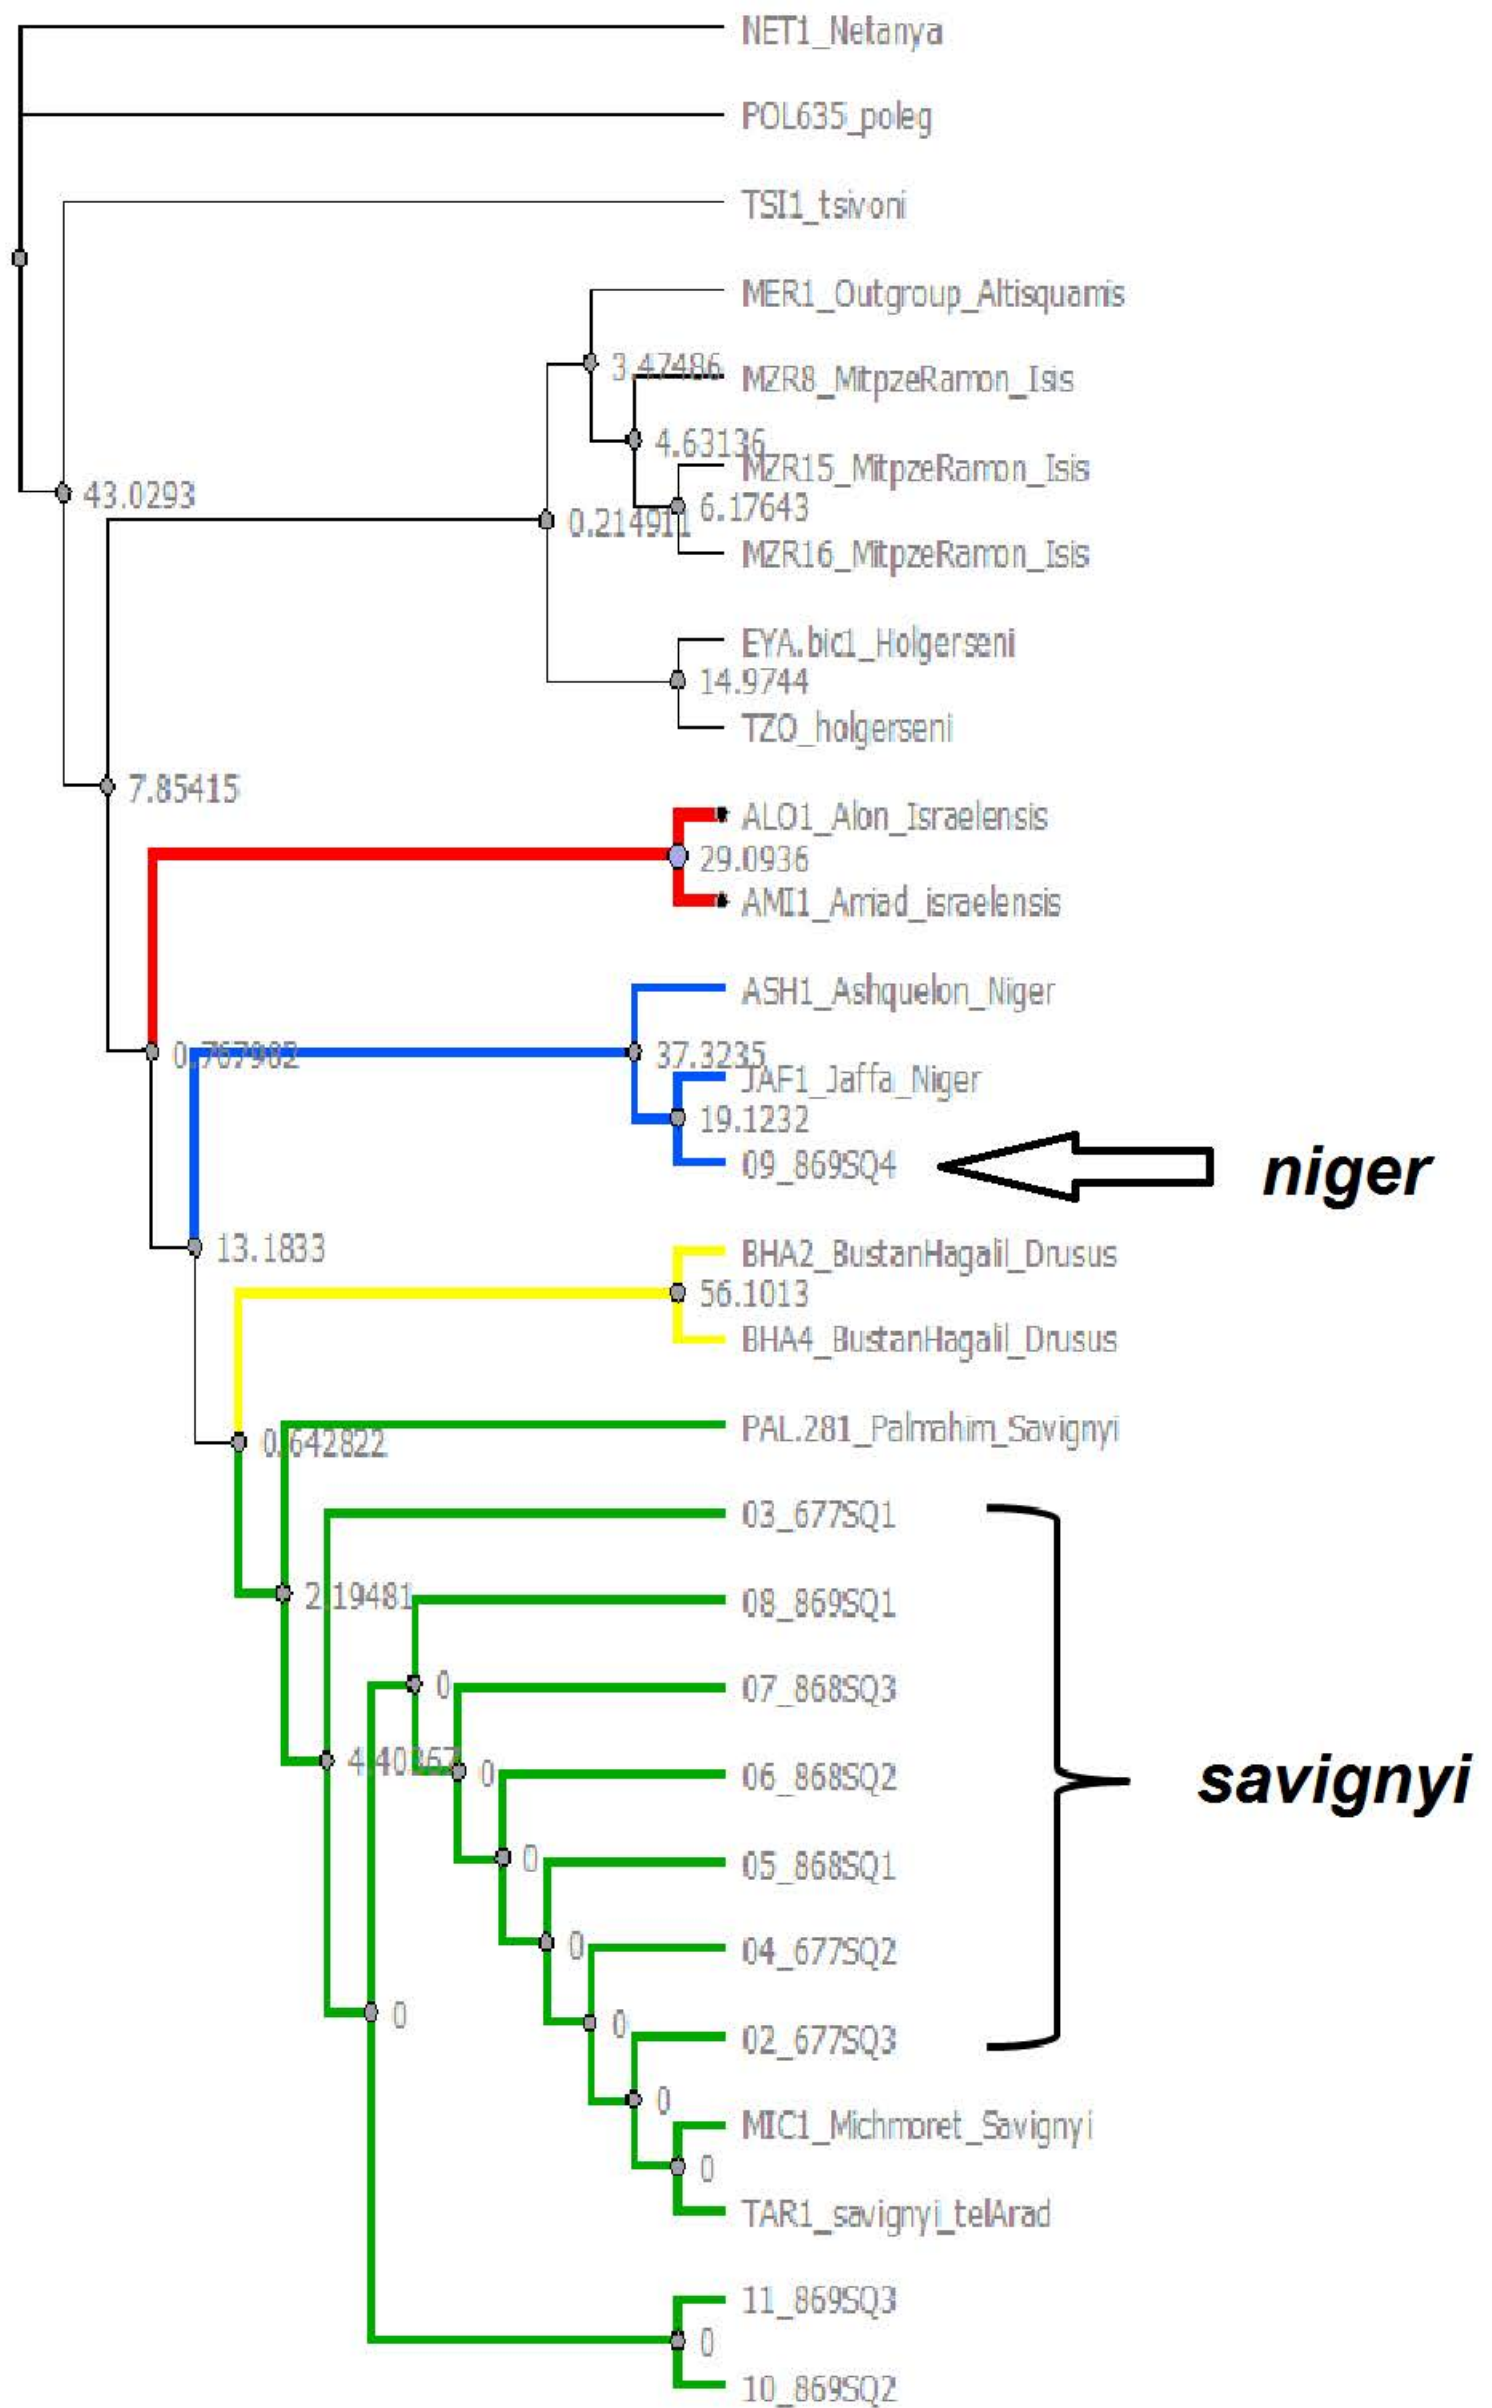

Figure S4

**Table 3.S1:** GPS coordinates of samples used in the study.

| Betzet population |                       | Tel Baruch population         |                       |                       |
|-------------------|-----------------------|-------------------------------|-----------------------|-----------------------|
| 525               | N33 04.651 E35 06.539 | 454                           | N32 07.637 E34 47.269 |                       |
| 526               | N33 04.651 E35 06.537 | 455                           | N32 07.624 E34 47.288 |                       |
| 527               | N33 04.650 E35 06.536 | 457                           | N32 07.606 E34 47.270 |                       |
| 528               | N33 04.675 E35 06.582 | 461                           | N32 07.634 E34 47.242 |                       |
| 530               | N33 04.601 E35 06.534 | 462                           | N32 07.592 E34 47.192 |                       |
| 531               | N33 04.615 E35 06.522 | 464                           | N32 07.613 E34 47.208 |                       |
| 532               | N33 04.619 E35 06.526 | 465                           | N32 07.601 E34 47.213 |                       |
| 533               | N33 04.586 E35 06.507 | 466                           | N32 07.604 E34 47.217 |                       |
| 534               | N33 04.612 E35 06.545 | 467                           | N32 07.595 E34 47.211 |                       |
| 535               | N33 04.600 E35 06.540 | 469                           | N32 07.572 E34 47.248 |                       |
| 538               | N33 04.584 E35 06.541 | 473                           | N32 07.577 E34 47.254 |                       |
| 539               | N33 04.635 E35 06.510 | 481                           | N32 07.592 E34 47.204 |                       |
| 540               | N33 04.658 E35 06.502 | 487                           | N32 07.628 E34 47.215 |                       |
| 541               | N33 04.561 E35 06.507 | 489                           | N32 07.620 E34 47.198 |                       |
| 542               | N33 04.563 E35 06.509 | 491                           | N32 07.601 E34 47.186 |                       |
| 543               | N33 04.559 E35 06.521 | 498                           | N32 07.578 E34 47.188 |                       |
| 544               | N33 04.579 E35 06.536 | 499                           | N32 07.561 E34 47.154 |                       |
| 545               | N33 04.582 E35 06.525 | 500                           | N32 07.562 E34 47.151 |                       |
| 546               | N33 04.585 E35 06.526 | 505                           | N32 07.573 E34 47.164 |                       |
| 547               | N33 04.585 E35 06.526 | 506                           | N32 07.572 E34 47.162 |                       |
| 548               | N33 04.589 E35 06.523 | 599                           | N32 07.616 E34 47.254 |                       |
| 549               | N33 04.567 E35 06.495 | 600                           | N32 07.582 E34 47.258 |                       |
| 550               | N33 04.572 E35 06.513 | 602                           | N32 07.559 E34 47.161 |                       |
| 551               | N33 04.585 E35 06.513 | 603                           | N32 07.557 E34 47.238 |                       |
| 552               | N33 04.665 E35 06.483 | 604                           | N32 07.558 E34 47.235 |                       |
| 553               | N33 04.674 E35 06.560 | 606                           | N32 07.554 E34 47.243 |                       |
| 554               | N33 04.672 E35 06.562 | 608                           | N32 07.616 E34 47.186 |                       |
| 555               | N33 04.678 E35 06.449 | 640                           | N32 16.934 E34 50.419 |                       |
| 556               | N33 04.678 E35 06.449 | 641                           | N32 07.454 E34 47.125 |                       |
| 557               | N33 04.679 E35 06.448 | 642                           | N32 07.455 E34 47.116 |                       |
| 559               | N33 04.671 E35 06.450 | 643                           | N32 07.512 E34 47.146 |                       |
| 560               | N33 04.627 E35 06.455 | 644                           | N32 07.496 E34 47.162 |                       |
| 562               | N33 04.628 E35 06.460 | 645                           | N32 07.537 E34 47.124 |                       |
| 563               | N33 04.652 E35 06.543 | 648                           | N32 07.682 E34 47.294 |                       |
| 564               | N33 04.635 E35 06.554 | 650                           | N32 07.681 E34 47.281 |                       |
| 565               | N33 04.634 E35 06.557 | 653                           | N32 07.951 E34 47.432 |                       |
| 568               | N33 04.586 E35 06.485 | 654                           | N32 07.933 E34 47.420 |                       |
| 570               | N33 04.654 E35 06.533 | 655                           | N32 07.944 E34 47.416 |                       |
| 571               | N33 04.653 E35 06.534 | 657                           | N32 07.770 E34 47.309 |                       |
| 575               | N33 04.595 E35 06.404 | 658                           | N32 07.775 E34 47.292 |                       |
| 576               | N33 04.604 E35 06.405 | <b>Merging samples-Betzet</b> |                       |                       |
| 577               | N33 04.601 E35 06.405 | 2                             | 969                   | N33 04.598 E35 06.566 |
| 578               | N33 04.511 E35 06.401 | 3                             | 970                   | N33 04.598 E35 06.567 |
| 579               | N33 04.507 E35 06.406 | 1                             | 971                   | N33 04.608 E35 06.554 |
| 580               | N33 04.445 E35 06.379 | 4                             | 973                   | N33 04.609 E35 06.549 |
| 581               | N33 04.440 E35 06.412 | 5                             | 974                   | N33 04.610 E35 06.549 |
| 582               | N33 04.366 E35 06.377 | 7                             | 976                   | N33 04.600 E35 06.542 |
| 583               | N33 04.370 E35 06.392 | 6                             | 977                   | N33 04.607 E35 06.549 |
| 584               | N33 04.373 E35 06.392 | 8                             | 979                   | N33 04.585 E35 06.545 |
| 585               | N33 04.323 E35 06.370 | 9                             | 981                   | N33 04.607 E35 06.554 |
| 586               | N33 04.328 E35 06.375 | 10                            | 982                   | N33 04.618 E35 06.561 |
| 587               | N33 04.269 E35 06.372 | 11                            | 983                   | N33 04.618 E35 06.560 |
| 588               | N33 04.267 E35 06.379 | 13                            | 985                   | N33 04.583 E35 06.537 |
| 589               | N33 04.175 E35 06.358 | 12                            | 986                   | N33 04.594 E35 06.540 |
| 590               | N33 04.196 E35 06.352 | 16                            | 987                   | N33 04.566 E35 06.499 |
| 595               | N33 04.097 E35 06.315 | 15                            | 988                   | N33 04.564 E35 06.524 |
| 596               | N33 04.088 E35 06.318 | 14                            | 989                   | N33 04.563 E35 06.524 |
|                   |                       | 17                            | 990                   | N33 04.565 E35 06.493 |
|                   |                       | 18                            | 991                   | N33 04.564 E35 06.501 |



| Sample name | Mitotype    | Locaion            | North         | East          | Collected by     |
|-------------|-------------|--------------------|---------------|---------------|------------------|
| 11          | Drusus      | Betzet             | N334.633      | E356.509      | TRB              |
| 21          | Drusus      | Bostan hagaili     | N3257.208     | E354.514      | TRB              |
| 31          | Drusus      | Kiryat haim        | N3257.277     | E354.529      | TRB              |
| 46          | Israelensis | Hof hacarmel       | N3246.951     | E3457.358     | TRB              |
| 51          | Savignyi    | Zikim              | N3136.807     | E3431.365     | TRB              |
| 61          | Niger       | Zikim west         | N3136.812     | E3431.303     | TRB              |
| 76          | Savignyi    | Askelon            | N3140.471     | E3433.256     | TRB              |
| 86          | complex     | Nitzan             | N3144.647     | E3437.954     | TRB              |
| 100         | complex     | Nitzan             | N3144.673     | E3437.92      | TRB              |
| 116         | Savignyi    | Palmachim          | N3155.92      | E3443.322     | TRB              |
| 146         | Savignyi    | Rishon             | N3158.874     | E3444.517     | TRB              |
| 211         | Israelensis | Tyrrat carmel      | N3246.791     | E3457.334     | TRB              |
| 241         | Savignyi    | Ceseria            | N3230.84      | E3453.892     | TRB              |
| 454         | Niger       | Tel Baruch         | N327.637      | E3447.269     | TRB              |
| 461         | Niger       | Tel Baruch         | N327.634      | E3447.242     | TRB              |
| 464         | savignyi    | Tel Baruch         | N327.613      | E3447.208     | TRB              |
| 465         | complex     | Tel Baruch         | N327.601      | E3447.213     | TRB              |
| 469         | Savignyi    | Tel Baruch         | N327.572      | E3447.248     | TRB              |
| 481         | savignyi    | Tel Baruch         | N327.592      | E3447.204     | TRB              |
| 486         | niger       | Tel Baruch         | N327.629      | E3447.216     | TRB              |
| 487         | niger       | Tel Baruch         | N327.628      | E3447.215     | TRB              |
| 489         | savignyi    | Tel Baruch         | N327.62       | E3447.198     | TRB              |
| 491         | niger       | Tel Baruch         | N327.601      | E3447.186     | TRB              |
| 499         | savignyi    | Tel Baruch         | N327.561      | E3447.154     | TRB              |
| 500         | Savignyi    | Tel Baruch         | N327.562      | E3447.151     | TRB              |
| 505         | Savignyi    | Tel Baruch         | N327.573      | E3447.164     | TRB              |
| 600         | savignyi    | Tel Baruch         | N327.582      | E3447.258     | TRB              |
| 602         | savignyi    | Tel Baruch         | N327.559      | E3447.161     | TRB              |
| 608         | Niger       | Tel Baruch         | N327.616      | E3447.186     | TRB              |
| 641         | Drusus      | Tel Baruch         | N327.454      | E3447.125     | TRB              |
| 642         | Drusus      | Tel Baruch         | N327.455      | E3447.116     | TRB              |
| 643         | Savignyi    | Tel Baruch         | N327.512      | E3447.146     | TRB              |
| 644         | Drusus      | Tel Baruch         | N327.496      | E3447.162     | TRB              |
| 650         | Niger       | Tel Baruch         | N327.681      | E3447.281     | TRB              |
| 653         | Niger       | Tel Baruch         | N327.951      | E3447.432     | TRB              |
| 657         | complex     | Tel Baruch         | N327.77       | E3447.309     | TRB              |
| 922         | Israelensis | Atlit              | N3242.587     | E3456.623     | TRB              |
| 993         | Israelensis | Tveria             | N3248.044     | E3532.211     | TRB              |
| 994         | Israelensis | Tveria             | N3248.021     | E3532.223     | TRB              |
| 995         | Israelensis | Amiad              | N3254.951     | E3532.76      | TRB              |
| 996         | Israelensis | Amiad              | N3254.952     | E3532.761     | TRB              |
| 997         | Israelensis | Agmon              | N336.708      | E3535.079     | TRB              |
| 999         | Savignyi    | Vingate            | N3215.381     | E3449.7       | TRB              |
| 1000        | Savignyi    | Vingate            | N3215.381     | E3449.7       | TRB              |
| 1001        | Savignyi    | Vingate            | N3215.381     | E3449.7       | TRB              |
| 498         | Savignyi    | Tel Baruch         | N327.578      | E3447.188     | TRB              |
| 506         | Savignyi    | Tel Baruch         | N327.572      | E3447.162     | TRB              |
| 641tb       | Drusus      | Tel Baruch         | N327.454      | E3447.125     | TRB              |
| 642tb       | Drusus      | Tel Baruch         | N327.455      | E3447.116     | TRB              |
| 858hab      | Israelensis | Habonim            | N3238.932     | E3455.664     | TRB              |
| anm1        | Israelensis | Allonim            | 32°42'40.2"N  | 35°08'33.9"E  | Eyer et al. 2017 |
| ash101      | Savignyi    | Ashdod             | N3149.883     | E3439.777     | Eyer et al. 2017 |
| asv1        | Israelensis | Azmon Segev        | 32°51'47.6"N  | 35°15'13.1"E  | Eyer et al. 2017 |
| bim1        | Israelensis | Bir El Maksur      | 32°46'05.5"N  | 35°14'08.2"E  | Eyer et al. 2017 |
| bmh3        | Isis        | Be'er Menuha       | 30°18'3.71"N  | 35°7'53.97"E  | Eyer et al. 2017 |
| dha1        | Israelensis | Deir Hanna         | 32°51'35.7"N  | 35°21'35.7"E  | Eyer et al. 2017 |
| dov3        | Israelensis | Daverat            | 32°39'14.2"N  | 35°22'39.7"E  | Eyer et al. 2017 |
| eha1        | Israelensis | En Harod (Me'uhad) | 32°33'21.6"N  | 35°22'59.3"E  | Eyer et al. 2017 |
| ehn4        | Israelensis | En HaNaziv         | 32°28'36.4"N  | 35°29'54.6"E  | Eyer et al. 2017 |
| ely3        | Israelensis | Elyagim            | 32°37'51.2"N  | 35°04'10.4"E  | Eyer et al. 2017 |
| eyd         | Isis        | En 'Avedat         | 30°50'49.99"N | 34°46'45.46"E | Eyer et al. 2017 |
| eya1        | Holgerseni  | En Yahav 2         | 30°39'51.32"N | 35°15'36.72"E | Eyer et al. 2017 |
| eyh1        | Holgerseni  | En Yahav           | 30°39'44.79"N | 35°14'19.59"E | Eyer et al. 2017 |
| gaa3        | Savignyi    | Ga'ash             | 32°14'25.50"N | 34°49'44.63"E | Eyer et al. 2017 |
| ghs         | Savignyi    | Gan hashomron      | 32°28'04.3"N  | 34°59'25.2"E  | Eyer et al. 2017 |
| gid1        | Israelensis | Gid'ona            | 32°32'48.3"N  | 35°21'30.2"E  | Eyer et al. 2017 |
| hbk1        | Israelensis | Ha---Biq'a         | 32°03'01.7"N  | 35°27'44.2"E  | Eyer et al. 2017 |
| her1        | Savignyi    | Hertzelia          | 32°09'45.36"N | 34°48'03.07"E | TRB              |
| her2        | Savignyi    | Hertzelia          | 32°09'45.36"N | 34°48'03.07"E | TRB              |
| hoa3        | Israelensis | Horbat 'Ammudim    | 32°48'46.4"N  | 35°24'25.3"E  | Eyer et al. 2017 |
| hzy1        | Israelensis | HaZayit            | 32°36'44.8"N  | 35°00'20.6"E  | Eyer et al. 2017 |
| hzy1_2      | Niger       | Jaffa              | 32°36'44.8"N  | 35°00'20.6"E  | Eyer et al. 2017 |
| jaf1        | Niger       | Jaffa              | 32°2435.91"N  | 34°44'48.63"E | Eyer et al. 2017 |
| jaf2        | Niger       | Jaffa              | 32°2435.91"N  | 34°44'48.63"E | Eyer et al. 2017 |
| jer1        | Israelensis | Jerusalem          | 31°45'8.94"N  | 35°12'50.50"E | Eyer et al. 2021 |
| maoon       | unknown     | Ma'aon             | 31°24'52.53"N | 35°09'50.01"E | Friedman L.      |
| mae1        | Israelensis | Ma'ale Efrayim     | 32°03'58.6"N  | 35°23'59.0"E  | Eyer et al. 2017 |
| mhe         | Israelensis | Mishmar Ha'Emeq    | 32°36'47.1"N  | 35°08'50.3"E  | Eyer et al. 2017 |
| mic1        | Savignyi    | Michmoret          | 32°23'51.50"N | 34°52'13.60"E | TRB              |
| mic2        | Savignyi    | Michmoret          | 32°23'51.50"N | 34°52'13.60"E | TRB              |
| mzr1        | unknown     | Mizpe Ramon        | 30°36'18.11"N | 34°51'57.24"E | Rozenberg T.     |
| mzr3_2      | unknown     | Mizpe Ramon        | 30°36'18.11"N | 34°51'57.24"E | Rozenberg T.     |
| mzr4        | unknown     | Mizpe Ramon        | 30°36'18.11"N | 34°51'57.24"E | Rozenberg T.     |
| NEG2        | Isis        | Negev point 880    | 30°18'0.08"N  | 34°58'6.16"E  | Eyer et al. 2017 |
| NET3        | Savignyi    | Netanya            | 32°18'40.2"N  | 34°50'43.2"E  | Eyer et al. 2017 |
| ngv3        | unknown     | Negev point 881    | 30°26'25.76"N | 34°56'19.55"E | Eyer et al. 2017 |
| pol633      | savignyi    | Poleg              | N3247.218     | E351.229      | TRB              |
| pol634      | savignyi    | Poleg              | N3216.877     | E3450.31      | TRB              |
| pol635      | savignyi    | Poleg              | N3216.906     | E3450.333     | TRB              |
| pol636      | savignyi    | Poleg              | N3216.897     | E3450.334     | TRB              |
| pol637      | savignyi    | Poleg              | N3216.915     | E3450.417     | TRB              |
| poleg638    | savignyi    | Poleg              | N3216.933     | E3450.42      | TRB              |
| qed         | Israelensis | Qedumim            | 32.212896     | 35.159068     | Friedman L.      |
| revpa6      | Savignyi    | Revivim            | 31°02'39.2"N  | 34°43'34.0"E  | Eyer PA          |
| sat         | Savignyi    | Sattaf             | 31°46'18.6"N  | 35°07'38.9"E  | Eyer et al. 2017 |
| sdo1        | Savignyi    | Sedom              | 31°03'27.26"N | 35°23'02.13"E | Renan I.         |
| sus         | Savignyi    | Susya              | 31°23'39.07"N | 35°07'01.00"E | Friedman L.      |
| taf         | Savignyi    | tel Afek           | 32°7'32.43"N  | 34°53'44.21"E | Eyer et al. 2017 |
| tam2        | Israelensis | Tamra              | 32°52'31.2"N  | 35°10'33.7"E  | Eyer et al. 2017 |

Table S2: The number of nests used in each of the analysis.

| Location   | QL nests | QR nests | Nests in merging experiment | Nests in microsat analysis | Nests in CHC analysis |
|------------|----------|----------|-----------------------------|----------------------------|-----------------------|
| Betzet     | 76       | 5        | 22                          | 57                         | 49                    |
| Tel Baruch | 39       | 21       | 10                          | 26                         | 28                    |

Table S3: Assumed matriline according to COLONY in the Betzet population.

| Nest # | Cn02 | Cn02 | Cn02 | Ch08 | Cc54 | Ch12 | Ch01 | Ch11 | Ch10 |     |     |     |     |     |     |     |
|--------|------|------|------|------|------|------|------|------|------|-----|-----|-----|-----|-----|-----|-----|
| 543    | 90   | 90   | 105  | 113  | 130  | 136  | 213  | 213  | 93   | 97  | 176 | 194 | 235 | 235 | 274 | 304 |
| 550    | 90   | 90   | 105  | 113  | 130  | 136  | 213  | 213  | 93   | 97  | 176 | 194 | 235 | 247 | 274 | 304 |
| 579    | 90   | 90   | 109  | 113  | 136  | 136  | 207  | 217  | 117  | 117 | 174 | 180 | 233 | 235 | 304 | 310 |
| 578    | 90   | 90   | 113  | 113  | 136  | 136  | 207  | 217  | 117  | 117 | 174 | 178 | 233 | 235 | 304 | 310 |
| 533    | 90   | 90   | 111  | 111  | 128  | 130  | 209  | 219  | 85   | 103 | 176 | 176 | 235 | 249 | 304 | 310 |
| 551    | 90   | 90   | 111  | 111  | 128  | 130  | 209  | 219  | 85   | 103 | 176 | 176 | 235 | 249 | 304 | 310 |
| 565    | 90   | 90   | 111  | 111  | 128  | 130  | 207  | 213  | 85   | 85  | 176 | 180 | 245 | 249 | 298 | 298 |
| 564    | 90   | 90   | 111  | 111  | 128  | 130  | 207  | 213  | 85   | 85  | 176 | 180 | 245 | 249 | 298 | 298 |
| 525    | 90   | 90   | 111  | 113  | 130  | 132  | 213  | 219  | 0    | 0   | 174 | 178 | 233 | 235 | 286 | 298 |
| 527    | 90   | 90   | 111  | 113  | 130  | 132  | 213  | 219  | 0    | 0   | 174 | 178 | 233 | 235 | 286 | 298 |
| 570    | 90   | 90   | 111  | 113  | 130  | 132  | 213  | 219  | 0    | 0   | 174 | 174 | 233 | 235 | 286 | 298 |
| 577    | 90   | 90   | 111  | 113  | 128  | 136  | 209  | 217  | 93   | 117 | 174 | 176 | 233 | 235 | 262 | 298 |
| 576    | 90   | 90   | 111  | 113  | 128  | 136  | 209  | 217  | 93   | 117 | 174 | 176 | 233 | 235 | 262 | 298 |
| 535    | 90   | 90   | 109  | 111  | 134  | 136  | 211  | 219  | 93   | 117 | 174 | 176 | 247 | 249 | 262 | 306 |
| 530    | 90   | 90   | 109  | 111  | 134  | 136  | 211  | 219  | 93   | 117 | 174 | 176 | 247 | 249 | 262 | 306 |
| 560    | 90   | 90   | 111  | 119  | 128  | 136  | 209  | 217  | 85   | 85  | 176 | 178 | 233 | 245 | 286 | 304 |
| 562    | 90   | 90   | 111  | 119  | 128  | 136  | 209  | 209  | 85   | 85  | 176 | 178 | 233 | 245 | 286 | 304 |
| 544    | 90   | 107  | 113  | 119  | 128  | 130  | 209  | 213  | 0    | 0   | 174 | 178 | 247 | 247 | 286 | 304 |
| 538    | 90   | 107  | 113  | 119  | 128  | 130  | 209  | 213  | 0    | 0   | 174 | 178 | 247 | 247 | 286 | 304 |
| 545    | 90   | 107  | 111  | 111  | 130  | 136  | 213  | 219  | 85   | 103 | 176 | 178 | 247 | 251 | 274 | 314 |
| 546    | 90   | 107  | 111  | 111  | 130  | 136  | 213  | 219  | 0    | 0   | 176 | 178 | 247 | 251 | 274 | 314 |
| 547    | 90   | 107  | 111  | 111  | 130  | 136  | 213  | 219  | 0    | 0   | 176 | 178 | 247 | 251 | 274 | 314 |
| 548    | 90   | 107  | 111  | 111  | 130  | 136  | 213  | 219  | 0    | 0   | 176 | 178 | 247 | 251 | 274 | 314 |
| 581    | 90   | 90   | 105  | 113  | 130  | 130  | 209  | 211  | 93   | 103 | 174 | 176 | 235 | 245 | 286 | 298 |
| 589    | 90   | 90   | 105  | 113  | 128  | 136  | 213  | 217  | 85   | 117 | 174 | 219 | 233 | 233 | 286 | 298 |
| 563    | 90   | 90   | 111  | 111  | 130  | 132  | 213  | 219  | 0    | 0   | 174 | 178 | 233 | 247 | 286 | 298 |
| 532    | 90   | 90   | 111  | 113  | 136  | 136  | 209  | 217  | 0    | 0   | 174 | 174 | 233 | 249 | 286 | 298 |
| 554    | 90   | 90   | 113  | 119  | 130  | 136  | 209  | 217  | 0    | 0   | 174 | 178 | 235 | 235 | 298 | 298 |
| 531    | 90   | 90   | 105  | 113  | 128  | 136  | 209  | 217  | 93   | 97  | 174 | 176 | 233 | 249 | 286 | 298 |
| 549    | 90   | 90   | 111  | 119  | 128  | 136  | 207  | 217  | 0    | 0   | 174 | 176 | 249 | 249 | 286 | 298 |
| 542    | 90   | 90   | 105  | 113  | 130  | 136  | 209  | 213  | 93   | 97  | 176 | 194 | 235 | 249 | 274 | 304 |
| 585    | 90   | 100  | 111  | 113  | 130  | 134  | 207  | 219  | 93   | 97  | 176 | 180 | 233 | 235 | 298 | 314 |
| 588    | 90   | 107  | 111  | 119  | 128  | 128  | 209  | 213  | 0    | 0   | 174 | 174 | 233 | 247 | 298 | 314 |
| 586    | 90   | 90   | 113  | 119  | 130  | 136  | 211  | 213  | 87   | 117 | 176 | 176 | 233 | 247 | 274 | 298 |
| 580    | 90   | 90   | 109  | 113  | 130  | 134  | 207  | 209  | 85   | 85  | 174 | 196 | 235 | 235 | 274 | 314 |
| 568    | 90   | 90   | 111  | 111  | 134  | 136  | 211  | 215  | 85   | 97  | 174 | 176 | 233 | 245 | 274 | 298 |
| 571    | 90   | 90   | 111  | 113  | 132  | 136  | 213  | 219  | 85   | 93  | 174 | 176 | 233 | 235 | 286 | 298 |
| 526    | 90   | 90   | 111  | 113  | 130  | 132  | 213  | 219  | 85   | 85  | 174 | 190 | 233 | 235 | 286 | 298 |
| 559    | 90   | 107  | 109  | 113  | 130  | 130  | 209  | 209  | 0    | 0   | 174 | 178 | 235 | 245 | 298 | 304 |
| 557    | 90   | 90   | 111  | 119  | 130  | 136  | 209  | 217  | 85   | 83  | 174 | 178 | 233 | 247 | 298 | 304 |
| 555    | 90   | 90   | 111  | 119  | 130  | 136  | 209  | 217  | 0    | 0   | 174 | 178 | 233 | 249 | 298 | 304 |
| 556    | 90   | 90   | 111  | 119  | 130  | 136  | 209  | 217  | 0    | 0   | 174 | 176 | 233 | 249 | 298 | 304 |
| 528    | 88   | 90   | 105  | 109  | 128  | 134  | 207  | 211  | 87   | 117 | 174 | 176 | 247 | 251 | 298 | 298 |
| 575    | 90   | 90   | 111  | 113  | 128  | 136  | 209  | 217  | 0    | 0   | 174 | 176 | 233 | 235 | 262 | 298 |
| 553    | 90   | 90   | 113  | 119  | 130  | 136  | 209  | 209  | 0    | 0   | 180 | 196 | 235 | 247 | 298 | 298 |
| 587    | 90   | 90   | 113  | 119  | 134  | 136  | 209  | 209  | 0    | 0   | 174 | 174 | 233 | 247 | 286 | 304 |
| 582    | 90   | 90   | 105  | 109  | 128  | 136  | 217  | 217  | 0    | 0   | 176 | 176 | 233 | 233 | 307 | 307 |
| 583    | 90   | 90   | 105  | 109  | 128  | 136  | 211  | 217  | 0    | 0   | 176 | 196 | 233 | 253 | 262 | 298 |
| 541    | 90   | 90   | 105  | 113  | 130  | 136  | 213  | 213  | 0    | 0   | 176 | 194 | 235 | 235 | 274 | 304 |
| 534    | 90   | 90   | 105  | 113  | 134  | 136  | 211  | 217  | 0    | 0   | 174 | 196 | 247 | 247 | 274 | 307 |
| 539    | 90   | 90   | 105  | 111  | 130  | 134  | 209  | 213  | 0    | 0   | 176 | 176 | 245 | 247 | 274 | 298 |
| 590    | 90   | 90   | 109  | 111  | 128  | 136  | 209  | 209  | 0    | 0   | 174 | 176 | 235 | 245 | 274 | 286 |
| 596    | 90   | 90   | 109  | 111  | 130  | 130  | 207  | 209  | 0    | 0   | 174 | 174 | 233 | 235 | 298 | 298 |
| 552    | 90   | 90   | 111  | 111  | 134  | 134  | 209  | 217  | 0    | 0   | 174 | 176 | 233 | 247 | 298 | 298 |
| 584    | 90   | 90   | 105  | 105  | 128  | 136  | 211  | 217  | 0    | 0   | 176 | 196 | 233 | 253 | 262 | 298 |
| 595    | 90   | 107  | 111  | 113  | 128  | 136  | 209  | 211  | 0    | 0   | 176 | 176 | 233 | 249 | 292 | 314 |
| 540    | 90   | 107  | 105  | 109  | 130  | 136  | 217  | 219  | 0    | 0   | 174 | 176 | 233 | 235 | 298 | 298 |
